# Supplementary material for: The prevalence of developmental coordination disorder in children: a systematic review and meta-analysis
Source: PubMed Central journal article supplement (PMC11464289; doi:10.3389/fped.2024.1387406), 2024-09-26
Supplement: Datasheet1.pdf [file Datasheet1.pdf]

## Pubmed search:

| Step | Search formula                                                                                                                                                                                                                                                                                                                                                                                                                                                                                                                                                                                                                                                                                                                                                                                                                                                                                                                                                                                                                                                                                                                                                                                         |
|------|--------------------------------------------------------------------------------------------------------------------------------------------------------------------------------------------------------------------------------------------------------------------------------------------------------------------------------------------------------------------------------------------------------------------------------------------------------------------------------------------------------------------------------------------------------------------------------------------------------------------------------------------------------------------------------------------------------------------------------------------------------------------------------------------------------------------------------------------------------------------------------------------------------------------------------------------------------------------------------------------------------------------------------------------------------------------------------------------------------------------------------------------------------------------------------------------------------|
| #1   | "Incidence"[Mesh]                                                                                                                                                                                                                                                                                                                                                                                                                                                                                                                                                                                                                                                                                                                                                                                                                                                                                                                                                                                                                                                                                                                                                                                      |
| #2   | Morbidity*[Title/Abstract] OR Prevalence*[Title/Abstract] OR epidemi*[Title/Abstract] OR incidence* [Title/Abstract] OR frequenc*[Title/Abstract] OR occurrence*[Title/Abstract]                                                                                                                                                                                                                                                                                                                                                                                                                                                                                                                                                                                                                                                                                                                                                                                                                                                                                                                                                                                                                       |
| #3   | #1OR#2                                                                                                                                                                                                                                                                                                                                                                                                                                                                                                                                                                                                                                                                                                                                                                                                                                                                                                                                                                                                                                                                                                                                                                                                 |
| #4   | "Motor Skills Disorders"[Mesh]                                                                                                                                                                                                                                                                                                                                                                                                                                                                                                                                                                                                                                                                                                                                                                                                                                                                                                                                                                                                                                                                                                                                                                         |
| #5   | Developmental Coordination Disorder[Title/Abstract] OR Coordination Disorder, Developmental[Title/Abstract] OR Developmental Coordination Disorders[Title/Abstract] OR Clumsiness[Title/Abstract] OR Clumsy [Title/Abstract] OR Clumsy child syndrome[Title/Abstract] OR Clumsy child [Title/Abstract] OR In-coordination[Title/Abstract] OR Dys-coordination[Title/Abstract] OR Minimal brain dysfunction[Title/Abstract] OR Minor neurological dysfunction/disorder[Title/Abstract] OR Motor delay[Title/Abstract] OR Perceptual-motor impairment[Title/Abstract] OR Motor coordination difficulties /problems[Title/Abstract] OR Motor learning difficulties /problems[Title/Abstract] OR Mild motor problems[Title/Abstract] OR Non-verbal learning disability /disorder/dysfunction[Title/Abstract] OR Sensorimotor difficulties[Title/Abstract] OR Sensory integrative dysfunction[Title/Abstract] OR Physical awkwardness[Title/Abstract] OR Physically awkward[Title/Abstract] OR Psychomotor disorders[Title/Abstract] OR Apraxias[Title/Abstract] OR Developmental dyspraxia[Title/Abstract] OR Perceptual motor dysfunction[Title/Abstract] OR Minimal cerebral dysfunction[Title/Abstract] |
| #6   | #4OR#5                                                                                                                                                                                                                                                                                                                                                                                                                                                                                                                                                                                                                                                                                                                                                                                                                                                                                                                                                                                                                                                                                                                                                                                                 |
| #7   | "Child"[Mesh]                                                                                                                                                                                                                                                                                                                                                                                                                                                                                                                                                                                                                                                                                                                                                                                                                                                                                                                                                                                                                                                                                                                                                                                          |
| #8   | Children[Title/Abstract] OR childhood[Title/Abstract] OR youth[Title/Abstract] OR adolescent[Title/Abstract] OR adolescence[Title/Abstract]                                                                                                                                                                                                                                                                                                                                                                                                                                                                                                                                                                                                                                                                                                                                                                                                                                                                                                                                                                                                                                                            |
| #9   | #7OR#8                                                                                                                                                                                                                                                                                                                                                                                                                                                                                                                                                                                                                                                                                                                                                                                                                                                                                                                                                                                                                                                                                                                                                                                                 |
| #16  | #3AND#6AND#9                                                                                                                                                                                                                                                                                                                                                                                                                                                                                                                                                                                                                                                                                                                                                                                                                                                                                                                                                                                                                                                                                                                                                                                           |

## Embase search:

| Step | Search formula                                                                                                                   |
|------|----------------------------------------------------------------------------------------------------------------------------------|
| #1   | 'Incidence':ab,ti OR 'Morbidity*':ab,ti OR 'Prevalence*':ab,ti OR 'epidemi*':ab,ti OR 'incidence*':ab,ti OR 'frequenc*':ab,ti OR |

- 
- 'occurrence\*':ab,ti
- #2 'Motor Skills Disorders':ab,ti OR 'Developmental Coordination Disorder':ab,ti OR 'Coordination Disorder, Developmental':ab,ti OR 'Clumsiness':ab,ti OR 'Clumsy':ab,ti OR 'Clumsy child syndrome':ab,ti OR 'Clumsy child':ab,ti OR 'In-coordination':ab,ti OR 'Minimal brain dysfunction':ab,ti OR 'Minor neurological dysfunction/disorder':ab,ti OR 'Motor delay':ab,ti OR 'Perceptual-motor impairment':ab,ti OR 'Motor coordination difficulties /problems':ab,ti OR 'Motor learning difficulties /problems':ab,ti OR 'Mild motor problems':ab,ti OR 'Non-verbal learning disability /disorder/dysfunction':ab,ti OR 'Sensorimotor difficulties':ab,ti OR 'Sensory integrative dysfunction':ab,ti OR 'Physical awkwardness':ab,ti OR 'Physically awkward':ab,ti OR 'Psychomotor disorders':ab,ti OR 'Apraxias':ab,ti OR 'Developmental dyspraxia':ab,ti OR 'Perceptual motor dysfunction':ab,ti OR 'Minimal cerebral dysfunction':ab,ti
- #3 'Child':ab,ti OR 'Children':ab,ti OR 'childhood':ab,ti OR 'youth':ab,ti OR 'adolescent':ab,ti OR 'adolescence':ab,ti
- #4 #1 AND #2 AND #3AND#4

### Web of science search:

---

| Step | Search formula                                                                                                                                                                                                                                                                                                                                                                                                                                                                                                                                                                                                                                                                                                                                                      |
|------|---------------------------------------------------------------------------------------------------------------------------------------------------------------------------------------------------------------------------------------------------------------------------------------------------------------------------------------------------------------------------------------------------------------------------------------------------------------------------------------------------------------------------------------------------------------------------------------------------------------------------------------------------------------------------------------------------------------------------------------------------------------------|
| #1   | TS=(Incidence OR Morbidit* OR Prevalence* OR epidemi* OR incidence* OR frequenc* OR occurrence*)                                                                                                                                                                                                                                                                                                                                                                                                                                                                                                                                                                                                                                                                    |
| #2   | TS=(Motor Skills Disorders OR Developmental Coordination Disorder OR Coordination Disorder, Developmental OR Developmental Coordination Disorders OR Clumsiness OR Clumsy OR Clumsy child syndrome OR Clumsy child OR In-coordination OR Dys-coordination OR Minimal brain dysfunction OR Minor neurological dysfunction/disorder OR Motor delay OR Perceptual-motor impairment OR Motor coordination difficulties / problems OR Motor learning difficulties /problems OR Mild motor problems OR Non-verbal learning disability /disorder/dysfunction OR Sensorimotor difficulties OR Sensory integrative dysfunction OR Physical awkwardness OR Physically awkward OR Psychomotor disorders OR Apraxias OR Developmental dyspraxia OR Perceptual motor dysfunction |

---

---

OR Minimal cerebral dysfunction)

#3 TS=(Child OR Children OR childhood OR youth OR adolescent OR adolescence)

#6 #1 AND #2 AND #3

---

The Cochrane Library search :

---

| Step | Search formula                                                                                                                                                                                                                                                                                                                                                                                                                                                                                                                                                                                                                                                                                                                                                                                                                                                                                                                                                                                                                                                                   |
|------|----------------------------------------------------------------------------------------------------------------------------------------------------------------------------------------------------------------------------------------------------------------------------------------------------------------------------------------------------------------------------------------------------------------------------------------------------------------------------------------------------------------------------------------------------------------------------------------------------------------------------------------------------------------------------------------------------------------------------------------------------------------------------------------------------------------------------------------------------------------------------------------------------------------------------------------------------------------------------------------------------------------------------------------------------------------------------------|
| #1   | "Incidence"                                                                                                                                                                                                                                                                                                                                                                                                                                                                                                                                                                                                                                                                                                                                                                                                                                                                                                                                                                                                                                                                      |
| #2   | (Morbidity*):ab,ti,kw OR (Prevalence*):ab,ti,kw OR (epidemi*):ab,ti,kw OR (incidence*):ab,ti,kw OR (frequenc*):ab,ti,kw OR (occurrence*):ab,ti,kw                                                                                                                                                                                                                                                                                                                                                                                                                                                                                                                                                                                                                                                                                                                                                                                                                                                                                                                                |
| #3   | #1OR#2                                                                                                                                                                                                                                                                                                                                                                                                                                                                                                                                                                                                                                                                                                                                                                                                                                                                                                                                                                                                                                                                           |
| #4   | "Motor Skills Disorders"[Mesh]                                                                                                                                                                                                                                                                                                                                                                                                                                                                                                                                                                                                                                                                                                                                                                                                                                                                                                                                                                                                                                                   |
| #5   | (Developmental Coordination Disorder):ab,ti,kw OR (Coordination Disorder, Developmental):ab,ti,kw OR (Developmental Coordination Disorders):ab,ti,kw OR (Clumsiness):ab,ti,kw OR (Clumsy):ab,ti,kw OR (Clumsy child syndrome):ab,ti,kw OR (Clumsy child ):ab,ti,kw OR (In coordination):ab,ti,kw OR (Dysplasia coordination):ab,ti,kw OR (Minimal brain dysfunction):ab,ti,kw OR (Minor neurological dysfunction / disorder):ab,ti,kw OR (Motor delay):ab,ti,kw OR (Perceptual motor impairment):ab,ti,kw OR (Motor coordination difficulties / problems):ab,ti,kw OR (Motor learning difficulties / problems):ab,ti,kw OR (Mild motor problems):ab,ti,kw OR (None verbal learning disability / disorder/dysfunction):ab,ti,kw OR (Sensorimotor difficulties):ab,ti,kw OR (Sensory integrative dysfunction):ab,ti,kw OR (Physical awkwardness):ab,ti,kw OR (Physically awkward):ab,ti,kw OR (Psychomotor disorders ):ab,ti,kw OR (Apraxias):ab,ti,kw OR (Developmental dyspraxia):ab,ti,kw OR (Perceptual motor dysfunction):ab,ti,kw OR (Minimal cerebral dysfunction):ab,ti,kw |
| #6   | #4OR#5                                                                                                                                                                                                                                                                                                                                                                                                                                                                                                                                                                                                                                                                                                                                                                                                                                                                                                                                                                                                                                                                           |
| #7   | "Child"                                                                                                                                                                                                                                                                                                                                                                                                                                                                                                                                                                                                                                                                                                                                                                                                                                                                                                                                                                                                                                                                          |
| #8   | (Children):ab,ti,kw OR (childhood):ab,ti,kw OR (youth):ab,ti,kw OR (adolescent):ab,ti,kw OR (adolescence):ab,ti,kw                                                                                                                                                                                                                                                                                                                                                                                                                                                                                                                                                                                                                                                                                                                                                                                                                                                                                                                                                               |
| #9   | #7OR#8                                                                                                                                                                                                                                                                                                                                                                                                                                                                                                                                                                                                                                                                                                                                                                                                                                                                                                                                                                                                                                                                           |
| #10  | #3AND#6AND#9                                                                                                                                                                                                                                                                                                                                                                                                                                                                                                                                                                                                                                                                                                                                                                                                                                                                                                                                                                                                                                                                     |

---

CINAHL search

| Step | Search formula                                                                                                                                                                                                                                                                                                                                                                                                                                                                                                                                                                                                                                                                                                                                                                                                            |
|------|---------------------------------------------------------------------------------------------------------------------------------------------------------------------------------------------------------------------------------------------------------------------------------------------------------------------------------------------------------------------------------------------------------------------------------------------------------------------------------------------------------------------------------------------------------------------------------------------------------------------------------------------------------------------------------------------------------------------------------------------------------------------------------------------------------------------------|
| #1   | 'Incidence' OR 'Morbidity*' OR 'Prevalence*' OR 'epidemi*' OR 'incidence*' OR 'frequenc*' OR 'occurrence*'                                                                                                                                                                                                                                                                                                                                                                                                                                                                                                                                                                                                                                                                                                                |
| #2   | 'Developmental Coordination Disorder' OR 'Coordination Disorder, Developmental' OR 'Developmental Coordination Disorders' OR 'Clumsiness' OR 'Clumsy' OR 'Clumsy child syndrome' OR 'Clumsy child' OR 'In-coordination' OR 'Dys-coordination' OR 'Minimal brain dysfunction' OR 'Minor neurological dysfunction/disorder' OR 'Motor delay' OR 'Perceptual-motor impairment' OR 'Motor coordination difficulties / problems' OR 'Motor learning difficulties /problems' OR 'Mild motor problems' OR 'Non-verbal learning disability /disorder/dysfunction' OR 'Sensorimotor difficulties' OR 'Sensory integrative dysfunction' OR 'Physical awkwardness' OR 'Physically awkward' OR 'Psychomotor disorders' OR 'Apraxias' OR 'Developmental dyspraxia' OR 'Perceptual motor dysfunction' OR 'Minimal cerebral dysfunction' |
| #3   | 'Child' OR 'Children' OR 'childhood' OR 'youth' OR 'adolescent' OR 'adolescence'                                                                                                                                                                                                                                                                                                                                                                                                                                                                                                                                                                                                                                                                                                                                          |
| #4   | #1 AND #2 AND #3                                                                                                                                                                                                                                                                                                                                                                                                                                                                                                                                                                                                                                                                                                                                                                                                          |

PsycINFO

| Step | Search formula                                                                                                                                                                                                                                                                                                                                                                                                                                                                                                                                                                                                                   |
|------|----------------------------------------------------------------------------------------------------------------------------------------------------------------------------------------------------------------------------------------------------------------------------------------------------------------------------------------------------------------------------------------------------------------------------------------------------------------------------------------------------------------------------------------------------------------------------------------------------------------------------------|
| #1   | 'Incidence' OR 'Morbidity*' OR 'Prevalence*' OR 'epidemi*' OR 'incidence*' OR 'frequenc*' OR 'occurrence*'                                                                                                                                                                                                                                                                                                                                                                                                                                                                                                                       |
| #2   | 'Developmental Coordination Disorder' OR 'Coordination Disorder, Developmental' OR 'Developmental Coordination Disorders' OR 'Clumsiness' OR 'Clumsy' OR 'Clumsy child syndrome' OR 'Clumsy child' OR 'In-coordination' OR 'Dys-coordination' OR 'Minimal brain dysfunction' OR 'Minor neurological dysfunction/disorder' OR 'Motor delay' OR 'Perceptual-motor impairment' OR 'Motor coordination difficulties / problems' OR 'Motor learning difficulties /problems' OR 'Mild motor problems' OR 'Non-verbal learning disability /disorder/dysfunction' OR 'Sensorimotor difficulties' OR 'Sensory integrative dysfunction' OR |

'Physical awkwardness' OR 'Physically awkward' OR 'Psychomotor disorders' OR 'Apraxias' OR 'Developmental dyspraxia' OR 'Perceptual motor dysfunction' OR 'Minimal cerebral dysfunction'

#3 'Child' OR 'Children' OR 'childhood' OR 'youth' OR 'adolescent' OR 'adolescence'

#4 #1 AND #2 AND #3

---
