# Supplementary material for: The prevalence of developmental coordination disorder in children: a systematic review and meta-analysis
Source: PubMed Central journal article supplement (PMC11464289; doi:10.3389/fped.2024.1387406), 2024-09-26
Supplement: Table1.pdf [file Table1.pdf]

Supplementary Table 1-Literature quality assessment

## NEWCASTLE - OTTAWA QUALITY ASSESSMENT SCALE COHORT STUDIES

| Author          | Year | Selection                                |                                     |                           |                                                                          | Comparability                                                   |                                                                 | Outcome               |                                                 |                                  | Quality score |
|-----------------|------|------------------------------------------|-------------------------------------|---------------------------|--------------------------------------------------------------------------|-----------------------------------------------------------------|-----------------------------------------------------------------|-----------------------|-------------------------------------------------|----------------------------------|---------------|
|                 |      | Representativeness of the exposed cohort | Selection of the non exposed cohort | Ascertainment of exposure | Demonstration that outcome of interest was not present at start of study | Comparability of cohorts on the basis of the design or analysis | Comparability of cohorts on the basis of the design or analysis | Assessment of outcome | Was follow-up long enough for outcomes to occur | Adequacy of follow-up of cohorts |               |
| Uusitalo K[33]  | 2020 |                                          |                                     | ★                         | ★                                                                        | ★                                                               | ★                                                               | ★                     | ★                                               |                                  | 6             |
| Caravale B[35]  | 2019 | ★                                        | ★                                   | ★                         | ★                                                                        | ★                                                               | ★                                                               | ★                     | ★                                               |                                  | 8             |
| Bolk J[30]      | 2018 |                                          | ★                                   | ★                         | ★                                                                        | ★                                                               | ★                                                               | ★                     | ★                                               |                                  | 7             |
| Zwicker J G[24] | 2013 | ★                                        | ★                                   | ★                         | ★                                                                        | ★                                                               | ★                                                               |                       |                                                 |                                  | 6             |
| Roberts G[32]   | 2011 |                                          |                                     |                           | ★                                                                        | ★                                                               | ★                                                               | ★                     | ★                                               |                                  | 5             |
| Lingam R[31]    | 2009 | ★                                        | ★                                   | ★                         | ★                                                                        | ★                                                               | ★                                                               | ★                     | ★                                               |                                  | 8             |
| Holsti L[27]    | 2002 |                                          |                                     | ★                         |                                                                          | ★                                                               | ★                                                               | ★                     | ★                                               |                                  | 5             |

## AGENCY FOR HEALTHCARE RESEARCH AND QUALITY, AHRQ

| Author        | Year | Define the source of information (survey, record review) | List inclusion and exclusion criteria for exposed and unexposed subjects (cases and controls) or refer to previous publications | Indicate time period used for identifying patients | Indicate whether or not subjects were consecutive if not population-based | Indicate if evaluators of subjective components of study were masked to other aspects of the status of the participants | Describe any assessments undertaken for quality assurance purposes (e.g., test/retest of primary outcome measurements) | Explain any patient exclusions from analysis | Describe how confounding was assessed and/or controlled. | If applicable, explain how missing data were handled in the analysis | Summarize patient response rates and completeness of data collection | Clarify what follow-up, if any, was expected and the percentage of patients for which incomplete data or follow-up was obtained | Quality score |
|---------------|------|----------------------------------------------------------|---------------------------------------------------------------------------------------------------------------------------------|----------------------------------------------------|---------------------------------------------------------------------------|-------------------------------------------------------------------------------------------------------------------------|------------------------------------------------------------------------------------------------------------------------|----------------------------------------------|----------------------------------------------------------|----------------------------------------------------------------------|----------------------------------------------------------------------|---------------------------------------------------------------------------------------------------------------------------------|---------------|
| Li YC[20]     | 2023 | ★                                                        | ★                                                                                                                               | ★                                                  | ★                                                                         |                                                                                                                         |                                                                                                                        | ★                                            |                                                          |                                                                      | ★                                                                    |                                                                                                                                 | 6             |
| Sujatha B[28] | 2023 | ★                                                        | ★                                                                                                                               | ★                                                  | ★                                                                         | ★                                                                                                                       | ★                                                                                                                      | ★                                            | ★                                                        |                                                                      |                                                                      |                                                                                                                                 | 8             |
| Yang Q[21]    | 2020 | ★                                                        |                                                                                                                                 | ★                                                  |                                                                           | ★                                                                                                                       | ★                                                                                                                      |                                              | ★                                                        |                                                                      |                                                                      |                                                                                                                                 | 5             |

|                   |      |   |   |   |   |   |   |   |   |   |   |  |   |
|-------------------|------|---|---|---|---|---|---|---|---|---|---|--|---|
| Lee<br>K[34]      | 2019 | ★ | ★ | ★ | ★ | ★ | ★ | ★ | ★ | ★ |   |  | 9 |
| Girish<br>S[15]   | 2016 | ★ | ★ | ★ |   |   | ★ |   | ★ | ★ |   |  | 5 |
| Cardoso<br>AA[29] | 2014 | ★ | ★ | ★ |   |   | ★ |   | ★ |   | ★ |  | 6 |
| Hua<br>J[22]      | 2014 | ★ | ★ |   |   | ★ | ★ |   | ★ |   | ★ |  | 6 |
| Rivard<br>L[23]   | 2014 | ★ | ★ | ★ |   |   | ★ |   | ★ |   | ★ |  | 6 |
| Cairney<br>J[25]  | 2005 | ★ | ★ | ★ |   |   | ★ |   | ★ |   | ★ |  | 6 |
| Hay J<br>A[26]    | 2004 | ★ | ★ | ★ |   |   | ★ |   | ★ |   | ★ |  | 6 |
| Kadesjö<br>B[14]  | 1999 | ★ | ★ | ★ |   |   | ★ |   | ★ | ★ | ★ |  | 7 |
